# Supplementary material
Source: publisher site journal article supplement (https://www.dovepress.com/article/225175)
Supplement: Supplementary file 1 [file get_supplementary_file.php]

**Supplementary File. Symptom management toolkit’s modifications for the program**

| **Information features** | **Toolkit content modifications to suit the program** |
| --- | --- |
| Information about symptoms (length and font size) | Each side-effect information to fit two to three pages (when possible) with a minimum of size 11 font. |
| Information about main oral chemotherapy-related symptoms | Include the 17 most common oral chemotherapy-related side effects: appetite (lack of), constipation, cough, diarrhoea, dry mouth, fatigue, fever, hand-foot syndrome, mouth sores, nausea/vomiting, numbness, pain, rash, shortness of breath, disturbed sleep, taste changes, and weakness. |
| Information about how to manage side-effects and what to report to healthcare professionals | Limit each piece of side-effect information to the following sections: what can I do about my side-effect?, what can family members and friends do to help me with my side-effect?, what should I report to my nurse or doctor about my side effect?, what should I discuss with my nurse or doctor about my side effect?, and where can I get more information? |
| Delivery of oral chemotherapy tailored information about symptoms | Information to be formatted as individual documents for each side-effect. To deliver program users information about the five main side-effects for their individual OC prescription |
| Focus on Australian users | Language adapted to Australian context |
